# Supplementary material for: Reduction of Genetic Variation When Far From the Niche Centroid: Prediction for Mangrove Species
Source: Frontiers journal article supplement (doi:10.3389/fcosc.2021.795365), 2022-01-26
Supplement: Table_1.XLSX [file Table_1.XLSX]

## Sheet: Table S1
Supplementary Table 1. Ocean basin, country, populations names, geographic coordinates, and estimates of observed (Ho) and expected heterozygosity (He) an its associated standard deviation (SD) computed from microsatellite data.
No	Basin	Country	Names of populations	Pop_ID	N	Longitude	Latitude	Ho	SD	He	SD	Reference
1	North Pacific	Mexico	El Sargento	PN04	40	-112.329	29.3285	0.05	0	0.14	0	Ochoa-Zavala et al., 2019
2	North Pacific	Mexico	Bahía Concepción	PN02	40	-111.882	26.7621	0.032	0.011	0.047	0.024	Ochoa-Zavala et al., 2019
3	North Pacific	Mexico	Topolobampo	PN06	40	-109.124	25.5822	0.141	0.114	0.142	0.1	Ochoa-Zavala et al., 2019
4	North Pacific	Mexico	Bahía Magdalena	PN03	40	-112.116	24.7942	0.117	0.194	0.159	0.192	Ochoa-Zavala et al., 2019
5	North Pacific	Mexico	La Paz	PN05	40	-110.333	24.1709	0.241	0.18	0.287	0.195	Ochoa-Zavala et al., 2019
6	North Pacific	Mexico	Bahía de Altata	PN11	40	-107.87	24.6157	0.202	0.161	0.291	0.221	Ochoa-Zavala et al., 2019
7	North Pacific	Mexico	El Caimanero	PN12	40	-106.063	22.8822	0.163	0.143	0.177	0.138	Ochoa-Zavala et al., 2019
8	North Pacific	Mexico	Marismas Nacionales	PN10	40	-105.64	22.3745	0.214	0.176	0.276	0.233	Ochoa-Zavala et al., 2019
9	North Pacific	Mexico	Punta Pérula	PC15	40	-105.125	19.592	0.307	0.221	0.331	0.2	Ochoa-Zavala et al., 2019
10	North Pacific	Mexico	Barra de Navidad	PC11	40	-104.672	19.1955	0.132	0.234	0.145	0.171	Ochoa-Zavala et al., 2019
11	North Pacific	Mexico	Técpan de Galeana	PC19	40	-100.792	17.2139	0.437	0.18	0.443	0.16	Ochoa-Zavala et al., 2019
12	North Pacific	Mexico	Barra de Tecoanapa	PS17	40	-98.7241	16.4978	0.27	0.255	0.269	0.23	Ochoa-Zavala et al., 2019
13	North Pacific	Mexico	Lagunas de Chacahua	PS20	40	-97.5918	16.0114	0.358	0.148	0.405	0.197	Ochoa-Zavala et al., 2019
14	North Pacific	Mexico	Mar Muerto	PS29	40	-93.846	16.0104	0.349	0.293	0.405	0.295	Ochoa-Zavala et al., 2019
15	North Pacific	Mexico	La Encrucijada	PS24	40	-92.831	15.1684	0.476	0.286	0.498	0.272	Ochoa-Zavala et al., 2019
16	North Pacific	Panama	Montijo Gulf	PM	40	-81.0567	7.82296	0.495	0.213	0.649	0.148	Cerón-Souza et al., 2015
17	North Pacific	Panama	Juan Díaz	PJ	14	-79.4401	9.02005	0.623	0.286	0.7	0.194	Cerón-Souza et al., 2015
18	North Pacific	Panama	San Miguel Gulf	PS	40	-78.2571	8.39361	0.372	0.295	0.451	0.311	Cerón-Souza et al., 2015
19	Gulf of Mexico	Mexico	Río Bravo	GM37	40	-97.1579	25.9461	0.23	0.178	0.296	0.217	Ochoa-Zavala et al., 2019
20	Gulf of Mexico	Mexico	La Pesca	GM41	40	-97.7415	23.7761	0.212	0.182	0.245	0.199	Ochoa-Zavala et al., 2019
21	Gulf of Mexico	Mexico	Tuxpan	GM56	40	-97.3415	20.9807	0.436	0.157	0.413	0.164	Ochoa-Zavala et al., 2019
22	Gulf of Mexico	Mexico	La Mancha	GM40	34	-96.3848	19.5862	0.274	0.201	0.309	0.24	Ochoa-Zavala et al., 2019
23	Gulf of Mexico	Mexico	Alvarado	GM53	41	-95.7823	18.7328	0.231	0.209	0.271	0.2	Ochoa-Zavala et al., 2019
24	Gulf of Mexico	Mexico	Sontecomapan	GM54	34	-95.0247	18.5084	0.295	0.252	0.28	0.221	Ochoa-Zavala et al., 2019
25	Gulf of Mexico	Mexico	Coatzacoalcos	GM36	39	-94.4314	18.0971	0.287	0.258	0.307	0.228	Ochoa-Zavala et al., 2019
26	Gulf of Mexico	Mexico	Mecoacán	GM46	35	-93.1155	18.4196	0.412	0.19	0.425	0.196	Ochoa-Zavala et al., 2019
27	Gulf of Mexico	Mexico	Pom-Atasta	PY67	40	-92.104	18.5745	0.514	0.162	0.463	0.121	Ochoa-Zavala et al., 2019
28	Gulf of Mexico	Mexico	Los Petenes	PY66	41	-90.3716	20.1589	0.435	0.256	0.452	0.24	Ochoa-Zavala et al., 2019
29	Gulf of Mexico	Mexico	Río Lagartos	PY70	40	-88.1282	21.6102	0.333	0.273	0.336	0.214	Ochoa-Zavala et al., 2019
30	Gulf of Mexico	Mexico	Yumbalam	PY81	40	-87.203	21.4436	0.358	0.275	0.316	0.217	Ochoa-Zavala et al., 2019
31	Gulf of Mexico	United States	Florida	UF	21	-82.75	28.25	0.46	0.212	0.548	0.225	Cerón-Souza et al., 2015
32	Caribbean Sea	Mexico	Cozumel	PY65	40	-86.9136	20.5556	0.491	0.3	0.469	0.202	Ochoa-Zavala et al., 2019
33	Caribbean Sea	Mexico	Sian Ka'an	PY77	40	-87.4709	20.111	0.493	0.169	0.5	0.153	Ochoa-Zavala et al., 2019
34	Caribbean Sea	Honduras	Honduras	HO	13	-83.7105	15.3882	0.552	0.212	0.538	0.213	Cerón-Souza et al., 2015
35	Caribbean Sea	Panama	Bocas del Toro	PB	40	-82.196	9.15548	0.501	0.121	0.628	0.143	Cerón-Souza et al., 2015
36	Caribbean Sea	Panama	Galeta	PG	40	-79.8418	9.39893	0.731	0.154	0.763	0.072	Cerón-Souza et al., 2015
37	Caribbean Sea	United States	Puerto Rico	PR	16	-65.78	18.41	0.378	0.2	0.458	0.17	Cerón-Souza et al., 2015
38	Caribbean Sea	France	Guadeloupe	GU	18	-61.47	16.2	0.346	0.301	0.362	0.194	Cerón-Souza et al., 2015
39	Caribbean Sea	Trinidad and Tobago	Trinidad	TR	19	-61.0222	10.3932	0.593	0.171	0.71	0.201	Cerón-Souza et al., 2015
40	North Atlantic	France	French Guiana	FG	14	-52.63	5.15	0.707	0.106	0.758	0.105	Cerón-Souza et al., 2015
N, number of individuals
Ochoa-Zavala, Maried et al. (2019), Data from: Contrasting colonization patterns of black mangrove (Avicennia germinans (L.) L.) gene pools along the Mexican coasts, Dryad, Dataset, https://doi.org/10.5061/dryad.4r0q7m5
Cerón‐Souza, I., Gonzalez, E. G., Schwarzbach, A. E., Salas‐Leiva, D. E., Rivera‐Ocasio, E., Toro‐Perea, N., et al. (2015). Contrasting demographic history and gene flow patterns of two mangrove species on either side of the Central American Isthmus. Ecology and Evolution, 5:16, 3486-3499.
